# Supplementary material for: Pain Is Widespread and Predicts Poor Mental Health Among Older Adults in Rural Malawi
Source: PubMed Central journal article supplement (PMC9074811; doi:10.1093/geroni/igac008), 2022-03-05
Supplement: igac008_suppl_supplementary_material.pdf [file igac008_suppl_supplementary_material.pdf]

**Supplementary material for “Pain is Widespread and Predicts Poor Mental Health and Subjective Wellbeing among Older Adults in Rural Malawi”**

**Table S1: Models Showing Association Between Mental Health and Wellbeing with Pain Severity and Duration: Women**

|                           | SF-12 mental        |                     |                     | depression         |                    |                    | anxiety            |                    |                    | wellbeing           |                     |                     |
|---------------------------|---------------------|---------------------|---------------------|--------------------|--------------------|--------------------|--------------------|--------------------|--------------------|---------------------|---------------------|---------------------|
|                           | (1)                 | (2)                 | (3)                 | (4)                | (5)                | (6)                | (7)                | (8)                | (9)                | (10)                | (11)                | (12)                |
| <b>slight</b>             | -0.135<br>(0.104)   |                     | -0.133<br>(0.103)   | 0.131<br>(0.101)   |                    | 0.130<br>(0.100)   | 0.168+<br>(0.101)  |                    | 0.166+<br>(0.100)  | -0.096<br>(0.099)   |                     | -0.096<br>(0.099)   |
| <b>moderate</b>           | -0.221*<br>(0.096)  |                     | -0.192*<br>(0.096)  | 0.339**<br>(0.093) |                    | 0.299**<br>(0.093) | 0.363**<br>(0.093) |                    | 0.330**<br>(0.093) | -0.192*<br>(0.091)  |                     | -0.193*<br>(0.092)  |
| <b>severe</b>             | -0.251*<br>(0.112)  |                     | -0.123<br>(0.116)   | 0.555**<br>(0.108) |                    | 0.450**<br>(0.113) | 0.584**<br>(0.108) |                    | 0.488**<br>(0.113) | -0.294**<br>(0.106) |                     | -0.299**<br>(0.111) |
| <b>disabling</b>          | -0.400**<br>(0.088) |                     | -0.320**<br>(0.091) | 0.583**<br>(0.086) |                    | 0.497**<br>(0.089) | 0.623**<br>(0.086) |                    | 0.554**<br>(0.088) | -0.187*<br>(0.084)  |                     | -0.182*<br>(0.087)  |
| <b>age 50-59</b>          | -0.132<br>(0.087)   | -0.131<br>(0.086)   | -0.135<br>(0.086)   | 0.042<br>(0.084)   | 0.038<br>(0.084)   | 0.041<br>(0.084)   | 0.050<br>(0.084)   | 0.045<br>(0.084)   | 0.049<br>(0.083)   | -0.167*<br>(0.082)  | -0.164*<br>(0.082)  | -0.162*<br>(0.082)  |
| <b>age 60-69</b>          | -0.208*<br>(0.099)  | -0.198*<br>(0.098)  | -0.199*<br>(0.098)  | 0.241*<br>(0.096)  | 0.219*<br>(0.096)  | 0.227*<br>(0.095)  | 0.267**<br>(0.096) | 0.247**<br>(0.096) | 0.256**<br>(0.095) | -0.141<br>(0.094)   | -0.138<br>(0.094)   | -0.143<br>(0.094)   |
| <b>age 70+</b>            | -0.351**<br>(0.112) | -0.305**<br>(0.112) | -0.311**<br>(0.112) | 0.521**<br>(0.109) | 0.474**<br>(0.109) | 0.481**<br>(0.109) | 0.632**<br>(0.109) | 0.587**<br>(0.109) | 0.594**<br>(0.109) | -0.415**<br>(0.107) | -0.400**<br>(0.107) | -0.400**<br>(0.107) |
| <b>Years of schooling</b> | -0.008<br>(0.015)   | -0.008<br>(0.015)   | -0.006<br>(0.015)   | 0.012<br>(0.015)   | 0.012<br>(0.015)   | 0.009<br>(0.015)   | 0.015<br>(0.015)   | 0.016<br>(0.015)   | 0.012<br>(0.015)   | -0.000<br>(0.014)   | 0.001<br>(0.014)    | 0.002<br>(0.014)    |
| <b>wealth 2nd ter</b>     | 0.188*<br>(0.088)   | 0.205**<br>(0.088)  | 0.202**<br>(0.088)  | -0.099<br>(0.088)  | -0.137+<br>(0.088) | -0.117<br>(0.088)  | 0.002<br>(0.088)   | -0.034<br>(0.088)  | -0.014<br>(0.088)  | 0.031<br>(0.088)    | 0.048<br>(0.088)    | 0.037<br>(0.088)    |

|                               |         |          |          |          |          |          |          |          |          |         |          |         |
|-------------------------------|---------|----------|----------|----------|----------|----------|----------|----------|----------|---------|----------|---------|
|                               | (0.076) | (0.076)  | (0.076)  | (0.074)  | (0.074)  | (0.074)  | (0.074)  | (0.074)  | (0.074)  | (0.073) | (0.072)  | (0.073) |
| <b>wealth 3rd ter</b>         | 0.330** | 0.321**  | 0.327**  | -0.136   | -0.140   | -0.136   | -0.067   | -0.069   | -0.065   | 0.087   | 0.096    | 0.090   |
|                               | (0.105) | (0.104)  | (0.104)  | (0.102)  | (0.101)  | (0.101)  | (0.101)  | (0.101)  | (0.101)  | (0.100) | (0.099)  | (0.099) |
| <b>married</b>                | 0.153*  | 0.149*   | 0.150*   | -0.201** | -0.182*  | -0.187** | -0.231** | -0.215** | -0.220** | 0.180*  | 0.168*   | 0.170*  |
|                               | (0.075) | (0.074)  | (0.074)  | (0.073)  | (0.073)  | (0.072)  | (0.072)  | (0.073)  | (0.072)  | (0.071) | (0.071)  | (0.071) |
| <b>Balaka</b>                 | 0.157+  | 0.171*   | 0.157+   | -0.262** | -0.277** | -0.262** | -0.031   | -0.047   | -0.031   | -0.082  | -0.082   | -0.083  |
|                               | (0.085) | (0.084)  | (0.085)  | (0.083)  | (0.082)  | (0.082)  | (0.083)  | (0.082)  | (0.082)  | (0.081) | (0.080)  | (0.081) |
| <b>Rumphi</b>                 | -0.005  | 0.006    | -0.001   | -0.157+  | -0.172+  | -0.160+  | 0.021    | 0.002    | 0.015    | -0.215* | -0.212*  | -0.214* |
|                               | (0.094) | (0.094)  | (0.094)  | (0.091)  | (0.091)  | (0.091)  | (0.091)  | (0.091)  | (0.091)  | (0.090) | (0.089)  | (0.089) |
| <b>duration &lt; 1 month</b>  |         | -0.210** |          |          | 0.344**  |          |          | 0.386**  |          |         | -0.181** |         |
|                               |         | (0.071)  |          |          | (0.069)  |          |          | (0.069)  |          |         | (0.068)  |         |
| <b>duration 2-3 months</b>    |         | -0.627** | -0.409** |          | 0.685**  | 0.241+   |          | 0.703**  | 0.214    |         | -0.041   | 0.190   |
|                               |         | (0.145)  | (0.144)  |          | (0.141)  | (0.140)  |          | (0.141)  | (0.140)  |         | (0.138)  | (0.137) |
| <b>duration &gt; 3 months</b> |         | -0.623** | -0.361*  |          | 1.054**  | 0.593**  |          | 0.969**  | 0.459**  |         | -0.451** | -0.242  |
|                               |         | (0.180)  | (0.180)  |          | (0.175)  | (0.174)  |          | (0.175)  | (0.174)  |         | (0.172)  | (0.172) |
| <b>Constant</b>               | -0.027  | -0.047   | -0.044   | -0.047   | -0.019   | -0.029   | -0.267*  | -0.238*  | -0.248*  | 0.187   | 0.175    | 0.180   |
|                               | (0.122) | (0.122)  | (0.122)  | (0.119)  | (0.118)  | (0.118)  | (0.118)  | (0.118)  | (0.118)  | (0.116) | (0.116)  | (0.116) |
| <b>Observations</b>           | 948     | 946      | 946      | 949      | 947      | 947      | 949      | 947      | 947      | 949     | 947      | 947     |

**Table S2: Models Showing Association Between Mental Health and Wellbeing with Pain Severity and Duration: Men**

|                           | SF-12 mental        |                     |                     | depression         |                    |                    | anxiety            |                    |                    | wellbeing           |                     |                     |
|---------------------------|---------------------|---------------------|---------------------|--------------------|--------------------|--------------------|--------------------|--------------------|--------------------|---------------------|---------------------|---------------------|
|                           | (1)                 | (2)                 | (3)                 | (4)                | (5)                | (6)                | (7)                | (8)                | (9)                | (10)                | (11)                | (12)                |
| <b>slight</b>             | -0.160<br>(0.124)   |                     | -0.163<br>(0.124)   | 0.170<br>(0.124)   |                    | 0.167<br>(0.124)   | 0.111<br>(0.122)   |                    | 0.105<br>(0.122)   | 0.159<br>(0.139)    |                     | 0.172<br>(0.139)    |
| <b>moderate</b>           | -0.339**<br>(0.099) |                     | -0.355**<br>(0.100) | 0.304**<br>(0.098) |                    | 0.305**<br>(0.099) | 0.220*<br>(0.097)  |                    | 0.217*<br>(0.098)  | -0.244*<br>(0.110)  |                     | -0.215+<br>(0.112)  |
| <b>severe</b>             | -0.594**<br>(0.127) |                     | -0.603**<br>(0.131) | 0.460**<br>(0.125) |                    | 0.438**<br>(0.129) | 0.332**<br>(0.123) |                    | 0.287*<br>(0.127)  | -0.036<br>(0.140)   |                     | 0.037<br>(0.145)    |
| <b>disabling</b>          | -0.469**<br>(0.108) |                     | -0.470**<br>(0.113) | 0.447**<br>(0.108) |                    | 0.418**<br>(0.113) | 0.381**<br>(0.106) |                    | 0.327**<br>(0.111) | -0.212+<br>(0.121)  |                     | -0.134<br>(0.126)   |
| <b>age 50-59</b>          | 0.037<br>(0.102)    | 0.077<br>(0.102)    | 0.048<br>(0.102)    | -0.047<br>(0.101)  | -0.081<br>(0.101)  | -0.061<br>(0.101)  | -0.015<br>(0.099)  | -0.051<br>(0.099)  | -0.037<br>(0.099)  | -0.183<br>(0.113)   | -0.167<br>(0.113)   | -0.165<br>(0.114)   |
| <b>age 60-69</b>          | -0.211*<br>(0.103)  | -0.201+<br>(0.103)  | -0.207*<br>(0.103)  | 0.226*<br>(0.102)  | 0.218*<br>(0.102)  | 0.222*<br>(0.102)  | 0.228*<br>(0.100)  | 0.220*<br>(0.100)  | 0.221*<br>(0.100)  | -0.215+<br>(0.115)  | -0.221+<br>(0.115)  | -0.210+<br>(0.115)  |
| <b>age 70+</b>            | -0.417**<br>(0.110) | -0.400**<br>(0.111) | -0.411**<br>(0.110) | 0.562**<br>(0.109) | 0.542**<br>(0.109) | 0.550**<br>(0.110) | 0.611**<br>(0.107) | 0.586**<br>(0.107) | 0.590**<br>(0.108) | -0.553**<br>(0.122) | -0.520**<br>(0.123) | -0.525**<br>(0.123) |
| <b>years of schooling</b> | -0.018<br>(0.013)   | -0.020<br>(0.013)   | -0.018<br>(0.013)   | 0.006<br>(0.013)   | 0.008<br>(0.013)   | 0.007<br>(0.013)   | 0.003<br>(0.013)   | 0.005<br>(0.013)   | 0.004<br>(0.013)   | -0.000<br>(0.015)   | -0.004<br>(0.015)   | -0.002<br>(0.015)   |
| <b>wealth 2nd ter</b>     | 0.136<br>(0.098)    | 0.141<br>(0.098)    | 0.122<br>(0.098)    | -0.117<br>(0.097)  | -0.124<br>(0.098)  | -0.110<br>(0.098)  | -0.058<br>(0.096)  | -0.060<br>(0.096)  | -0.049<br>(0.096)  | 0.106<br>(0.110)    | 0.126<br>(0.110)    | 0.111<br>(0.110)    |

|                               |                    |                     |                    |                    |                    |                    |                     |                     |                     |                     |                     |                     |
|-------------------------------|--------------------|---------------------|--------------------|--------------------|--------------------|--------------------|---------------------|---------------------|---------------------|---------------------|---------------------|---------------------|
| <b>wealth 3rd ter</b>         | 0.294**<br>(0.102) | 0.287**<br>(0.102)  | 0.276**<br>(0.102) | -0.103<br>(0.101)  | -0.102<br>(0.102)  | -0.093<br>(0.102)  | -0.170+<br>(0.100)  | -0.165+<br>(0.100)  | -0.156<br>(0.100)   | 0.165<br>(0.114)    | 0.186<br>(0.114)    | 0.171<br>(0.114)    |
| <b>married</b>                | 0.043<br>(0.146)   | 0.072<br>(0.147)    | 0.058<br>(0.147)   | -0.063<br>(0.146)  | -0.080<br>(0.146)  | -0.073<br>(0.146)  | 0.124<br>(0.144)    | 0.107<br>(0.144)    | 0.110<br>(0.144)    | 0.084<br>(0.164)    | 0.085<br>(0.165)    | 0.088<br>(0.164)    |
| <b>Balaka</b>                 | 0.163<br>(0.102)   | 0.134<br>(0.102)    | 0.146<br>(0.103)   | -0.059<br>(0.102)  | -0.049<br>(0.101)  | -0.051<br>(0.102)  | 0.031<br>(0.100)    | 0.040<br>(0.099)    | 0.043<br>(0.101)    | -0.184<br>(0.115)   | -0.139<br>(0.114)   | -0.176<br>(0.115)   |
| <b>Rumphi</b>                 | -0.042<br>(0.093)  | -0.040<br>(0.093)   | -0.055<br>(0.093)  | -0.048<br>(0.092)  | -0.053<br>(0.092)  | -0.042<br>(0.093)  | 0.090<br>(0.091)    | 0.087<br>(0.091)    | 0.096<br>(0.091)    | -0.327**<br>(0.104) | -0.295**<br>(0.104) | -0.320**<br>(0.104) |
| <b>duration &lt; 1 month</b>  |                    | -0.382**<br>(0.077) |                    |                    | 0.326**<br>(0.076) |                    |                     | 0.232**<br>(0.075)  |                     |                     | -0.071<br>(0.086)   |                     |
| <b>duration 2-3 months</b>    |                    | -0.308*<br>(0.155)  | 0.154<br>(0.156)   |                    | 0.390*<br>(0.154)  | 0.010<br>(0.155)   |                     | 0.343*<br>(0.151)   | 0.068<br>(0.153)    |                     | -0.364*<br>(0.173)  | -0.279<br>(0.175)   |
| <b>duration &gt; 3 months</b> |                    | -0.794**<br>(0.243) | -0.325<br>(0.242)  |                    | 0.749**<br>(0.241) | 0.357<br>(0.242)   |                     | 0.848**<br>(0.237)  | 0.560*<br>(0.238)   |                     | -0.512+<br>(0.272)  | -0.428<br>(0.272)   |
| <b>Constant</b>               | 0.356+<br>(0.191)  | 0.328+<br>(0.192)   | 0.359+<br>(0.191)  | -0.365+<br>(0.190) | -0.341+<br>(0.190) | -0.363+<br>(0.191) | -0.595**<br>(0.188) | -0.576**<br>(0.187) | -0.591**<br>(0.187) | 0.394+<br>(0.214)   | 0.366+<br>(0.214)   | 0.379+<br>(0.214)   |
| <b>Observations</b>           | 622                | 621                 | 621                | 626                | 625                | 625                | 626                 | 625                 | 625                 | 626                 | 625                 | 625                 |

---

**Table S3: Models Showing Association of Depression with Pain Severity and Duration: Women**

|                           | mild depression    |                    |                    | Moderate depression |                    |                    | Suicidal thoughts  |                    |                    |
|---------------------------|--------------------|--------------------|--------------------|---------------------|--------------------|--------------------|--------------------|--------------------|--------------------|
|                           | (1)                | (2)                | (3)                | (4)                 | (5)                | (6)                | (7)                | (8)                | (9)                |
| <b>slight</b>             | 0.075<br>(0.049)   |                    | 0.074<br>(0.049)   | 0.007<br>(0.035)    |                    | 0.007<br>(0.035)   | 0.047<br>(0.031)   |                    | 0.047<br>(0.031)   |
| <b>moderate</b>           | 0.189**<br>(0.044) |                    | 0.176**<br>(0.044) | 0.033<br>(0.031)    |                    | 0.018<br>(0.031)   | 0.065*<br>(0.028)  |                    | 0.061*<br>(0.028)  |
| <b>severe</b>             | 0.238**<br>(0.051) |                    | 0.206**<br>(0.054) | 0.089**<br>(0.033)  |                    | 0.064+<br>(0.035)  | 0.036<br>(0.034)   |                    | 0.025<br>(0.035)   |
| <b>disabling</b>          | 0.234**<br>(0.040) |                    | 0.209**<br>(0.042) | 0.098**<br>(0.027)  |                    | 0.080**<br>(0.027) | 0.102**<br>(0.025) |                    | 0.089**<br>(0.026) |
| <b>age 50-59</b>          | 0.033<br>(0.041)   | 0.033<br>(0.041)   | 0.033<br>(0.041)   | -0.034<br>(0.026)   | -0.036<br>(0.026)  | -0.034<br>(0.026)  | -0.050*<br>(0.024) | -0.053*<br>(0.025) | -0.051*<br>(0.025) |
| <b>age 60-69</b>          | 0.126**<br>(0.047) | 0.118*<br>(0.047)  | 0.122**<br>(0.047) | 0.022<br>(0.032)    | 0.017<br>(0.032)   | 0.018<br>(0.032)   | -0.004<br>(0.030)  | -0.008<br>(0.030)  | -0.006<br>(0.030)  |
| <b>age 70+</b>            | 0.192**<br>(0.054) | 0.179**<br>(0.054) | 0.181**<br>(0.054) | 0.070+<br>(0.040)   | 0.055<br>(0.039)   | 0.059<br>(0.039)   | 0.028<br>(0.037)   | 0.020<br>(0.037)   | 0.024<br>(0.037)   |
| <b>years of schooling</b> | 0.006<br>(0.007)   | 0.006<br>(0.007)   | 0.006<br>(0.007)   | 0.004<br>(0.005)    | 0.003<br>(0.005)   | 0.003<br>(0.005)   | -0.010*<br>(0.005) | -0.010*<br>(0.005) | -0.010*<br>(0.005) |
| <b>wealth 2nd ter</b>     | -0.071*<br>(0.031) | -0.084*<br>(0.031) | -0.076*<br>(0.031) | -0.035<br>(0.031)   | -0.042+<br>(0.031) | -0.041+<br>(0.031) | -0.043*<br>(0.031) | -0.045*<br>(0.031) | -0.046*<br>(0.031) |

|                              |          |          |          |          |          |          |         |         |         |
|------------------------------|----------|----------|----------|----------|----------|----------|---------|---------|---------|
|                              | (0.036)  | (0.036)  | (0.036)  | (0.023)  | (0.023)  | (0.023)  | (0.021) | (0.021) | (0.021) |
| <b>wealth 3rd ter</b>        | -0.103*  | -0.103*  | -0.102*  | -0.052   | -0.049   | -0.050   | 0.003   | 0.006   | 0.003   |
|                              | (0.049)  | (0.049)  | (0.049)  | (0.034)  | (0.033)  | (0.033)  | (0.029) | (0.029) | (0.029) |
| <b>married</b>               | -0.084*  | -0.079*  | -0.082*  | -0.069** | -0.062** | -0.062** | -0.009  | -0.008  | -0.007  |
|                              | (0.035)  | (0.035)  | (0.035)  | (0.023)  | (0.023)  | (0.023)  | (0.022) | (0.022) | (0.022) |
| <b>Balaka</b>                | -0.150** | -0.158** | -0.151** | -0.058*  | -0.060*  | -0.058*  | -0.042+ | -0.047* | -0.042+ |
|                              | (0.040)  | (0.039)  | (0.040)  | (0.026)  | (0.026)  | (0.026)  | (0.023) | (0.023) | (0.023) |
| <b>Rumphi</b>                | -0.080+  | -0.085+  | -0.081+  | -0.032   | -0.037   | -0.034   | -0.008  | -0.009  | -0.006  |
|                              | (0.045)  | (0.045)  | (0.045)  | (0.031)  | (0.031)  | (0.031)  | (0.030) | (0.030) | (0.030) |
| <b>duration &lt; 1month</b>  |          | 0.167**  |          |          | 0.046*   |          |         | 0.064** |         |
|                              |          | (0.033)  |          |          | (0.023)  |          |         | (0.023) |         |
| <b>duration 2-3 months</b>   |          | 0.300**  | 0.096    |          | 0.100*   | 0.036    |         | 0.088*  | 0.026   |
|                              |          | (0.068)  | (0.068)  |          | (0.040)  | (0.038)  |         | (0.038) | (0.036) |
| <b>duration &gt; 3months</b> |          | 0.358**  | 0.151+   |          | 0.173**  | 0.104*   |         | 0.146** | 0.070+  |
|                              |          | (0.087)  | (0.088)  |          | (0.045)  | (0.043)  |         | (0.042) | (0.040) |
| <b>Observations</b>          | 949      | 947      | 947      | 949      | 947      | 947      | 949     | 947     | 947     |

**Table S4: Models Showing Association of Depression with Pain Severity and Duration: Men**

|                           | mild depression |         | moderate depression |         |         | suicidal thoughts |         |         |         |
|---------------------------|-----------------|---------|---------------------|---------|---------|-------------------|---------|---------|---------|
|                           | (1)             | (2)     | (3)                 | (4)     | (5)     | (6)               | (7)     | (8)     | (9)     |
| <b>slight</b>             | 0.113+          |         | 0.114+              | 0.040   |         | 0.038             | 0.018   |         | 0.021   |
|                           | (0.061)         |         | (0.061)             | (0.040) |         | (0.039)           | (0.031) |         | (0.032) |
| <b>moderate</b>           | 0.154**         |         | 0.163**             | 0.075*  |         | 0.073*            | 0.035   |         | 0.040+  |
|                           | (0.048)         |         | (0.048)             | (0.030) |         | (0.030)           | (0.022) |         | (0.023) |
| <b>severe</b>             | 0.157*          |         | 0.164**             | 0.051   |         | 0.039             | 0.056*  |         | 0.069*  |
|                           | (0.061)         |         | (0.063)             | (0.038) |         | (0.039)           | (0.025) |         | (0.028) |
| <b>disabling</b>          | 0.186**         |         | 0.186**             | 0.079*  |         | 0.066*            | 0.023   |         | 0.032   |
|                           | (0.051)         |         | (0.053)             | (0.032) |         | (0.033)           | (0.025) |         | (0.027) |
| <b>age 50-59</b>          | -0.015          | -0.025  | -0.022              | -0.038  | -0.041  | -0.042            | -0.032  | -0.038  | -0.035  |
|                           | (0.047)         | (0.047) | (0.047)             | (0.027) | (0.027) | (0.027)           | (0.022) | (0.024) | (0.024) |
| <b>age 60-69</b>          | 0.120*          | 0.118*  | 0.117*              | 0.038   | 0.040   | 0.037             | -0.010  | -0.016  | -0.012  |
|                           | (0.051)         | (0.051) | (0.051)             | (0.033) | (0.034) | (0.034)           | (0.025) | (0.027) | (0.026) |
| <b>age 70+</b>            | 0.284**         | 0.280** | 0.281**             | 0.043   | 0.038   | 0.038             | -0.001  | -0.001  | -0.000  |
|                           | (0.056)         | (0.057) | (0.057)             | (0.036) | (0.036) | (0.037)           | (0.027) | (0.030) | (0.029) |
| <b>years of schooling</b> | 0.001           | 0.002   | 0.001               | -0.001  | -0.001  | -0.001            | 0.001   | 0.001   | 0.001   |
|                           | (0.007)         | (0.007) | (0.007)             | (0.004) | (0.004) | (0.004)           | (0.003) | (0.003) | (0.003) |
| <b>wealth 2nd ter</b>     | -0.006          | -0.001  | 0.002               | -0.032  | -0.030  | -0.031            | 0.011   | 0.015   | 0.017   |
|                           | (0.049)         | (0.048) | (0.048)             | (0.029) | (0.029) | (0.029)           | (0.022) | (0.023) | (0.023) |



|                              |                    |                    |                    |                   |                   |                   |                   |                    |                    |
|------------------------------|--------------------|--------------------|--------------------|-------------------|-------------------|-------------------|-------------------|--------------------|--------------------|
| <b>wealth 3rd ter</b>        | -0.028<br>(0.050)  | -0.021<br>(0.050)  | -0.018<br>(0.051)  | -0.018<br>(0.030) | -0.015<br>(0.030) | -0.015<br>(0.030) | 0.013<br>(0.023)  | 0.018<br>(0.024)   | 0.017<br>(0.024)   |
| <b>married</b>               | -0.119+<br>(0.069) | -0.127+<br>(0.068) | -0.126+<br>(0.068) | -0.037<br>(0.040) | -0.037<br>(0.040) | -0.038<br>(0.040) | -0.041<br>(0.026) | -0.050+<br>(0.028) | -0.048+<br>(0.028) |
| <b>Balaka</b>                | -0.031<br>(0.050)  | -0.023<br>(0.050)  | -0.019<br>(0.050)  | 0.003<br>(0.029)  | -0.002<br>(0.029) | 0.003<br>(0.029)  | -0.021<br>(0.023) | -0.015<br>(0.024)  | -0.019<br>(0.024)  |
| <b>Rumphi</b>                | -0.002<br>(0.047)  | 0.004<br>(0.046)   | 0.007<br>(0.047)   | 0.017<br>(0.030)  | 0.015<br>(0.030)  | 0.018<br>(0.030)  | -0.024<br>(0.020) | -0.024<br>(0.021)  | -0.022<br>(0.021)  |
| <b>duration &lt; 1month</b>  |                    | 0.159**<br>(0.037) |                    |                   | 0.059*<br>(0.025) |                   |                   | 0.042*<br>(0.019)  |                    |
| <b>duration 2-3 months</b>   |                    | 0.073<br>(0.076)   | -0.097<br>(0.077)  |                   | 0.092*<br>(0.042) | 0.033<br>(0.041)  |                   | 0.000<br>(.)       | 0.000<br>(.)       |
| <b>duration &gt; 3months</b> |                    | 0.357**<br>(0.115) | 0.182<br>(0.116)   |                   | 0.129*<br>(0.059) | 0.071<br>(0.058)  |                   | 0.054<br>(0.051)   | 0.007<br>(0.050)   |
| <b>Observations</b>          | 626                | 625                | 625                | 626               | 625               | 625               | 626               | 586                | 586                |

**Figure S1:** Comparison of prevalence of any pain between MLSFH mature adults and HRS respondents 10 years older

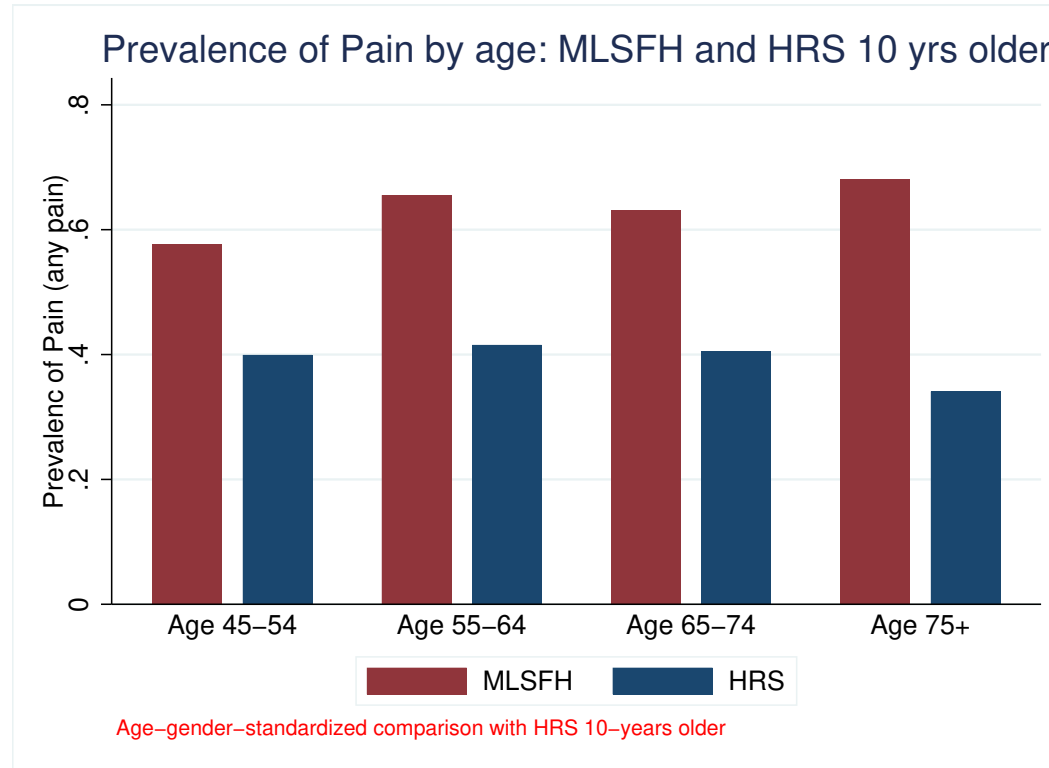

Notes: The figure reports the proportion of respondents in the MLSFH and 2010 Health and Retirement Survey (HRS) who reported having experienced any pain in response to the question "During the past year, have you experienced pain that lasted for one week or longer?" (this question was identically asked in the 2010 HRS pain module (Module 6) and the MLSFH. The HRS population is weighted to match the MLSFH age and gender distribution to eliminate differences related to different age or gender (also within each age group). The bars show the prevalence of any pain between MLSFH respondents as compared to HRS respondents 10 years older.
